# Supplementary material for: Defective humoral immunity disrupts bile acid homeostasis which promotes inflammatory disease of the small bowel
Source: PubMed Central journal article supplement (PMC8792037; doi:10.1038/s41467-022-28126-w), 2022-01-26

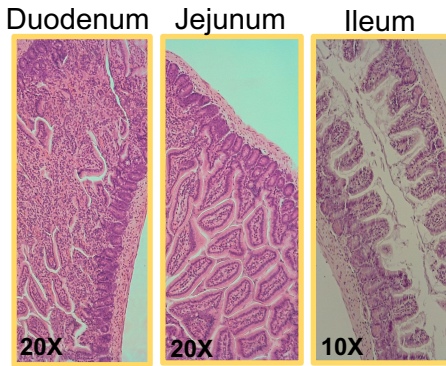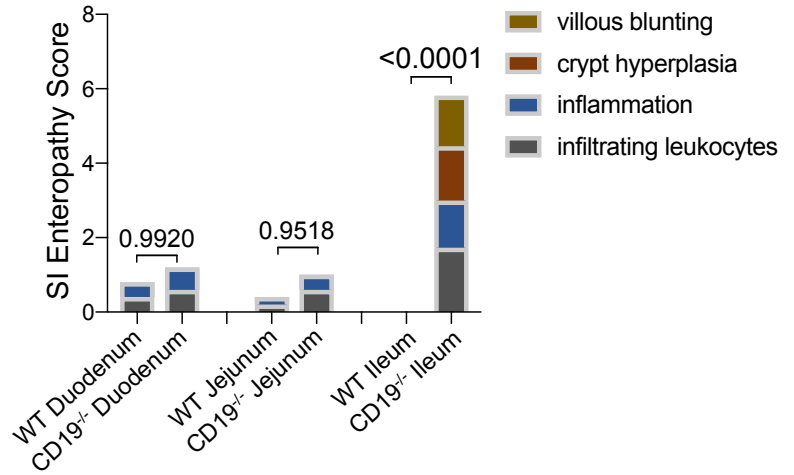

**Supplementary Figure S1. SI enteropathy is restricted to the ileum of CD19<sup>-/-</sup> mice.** Duodenal (n=5 WT, n=5 CD19<sup>-/-</sup>), jejunal (n=5 WT, n=5 CD19<sup>-/-</sup>), and ileal (n=6 WT, n=6 CD19<sup>-/-</sup>) sections were generated from WT and CD19<sup>-/-</sup> mice and H&E stained. SI enteropathy was scored using the four-point scoring method described in Materials and Methods. Two-tailed ANOVA with multiple comparisons (a Tukey's correction for multiple comparisons was applied); ns=non-significant, \*\*\*\*=p<0.0001.

## Unconjugated BAs

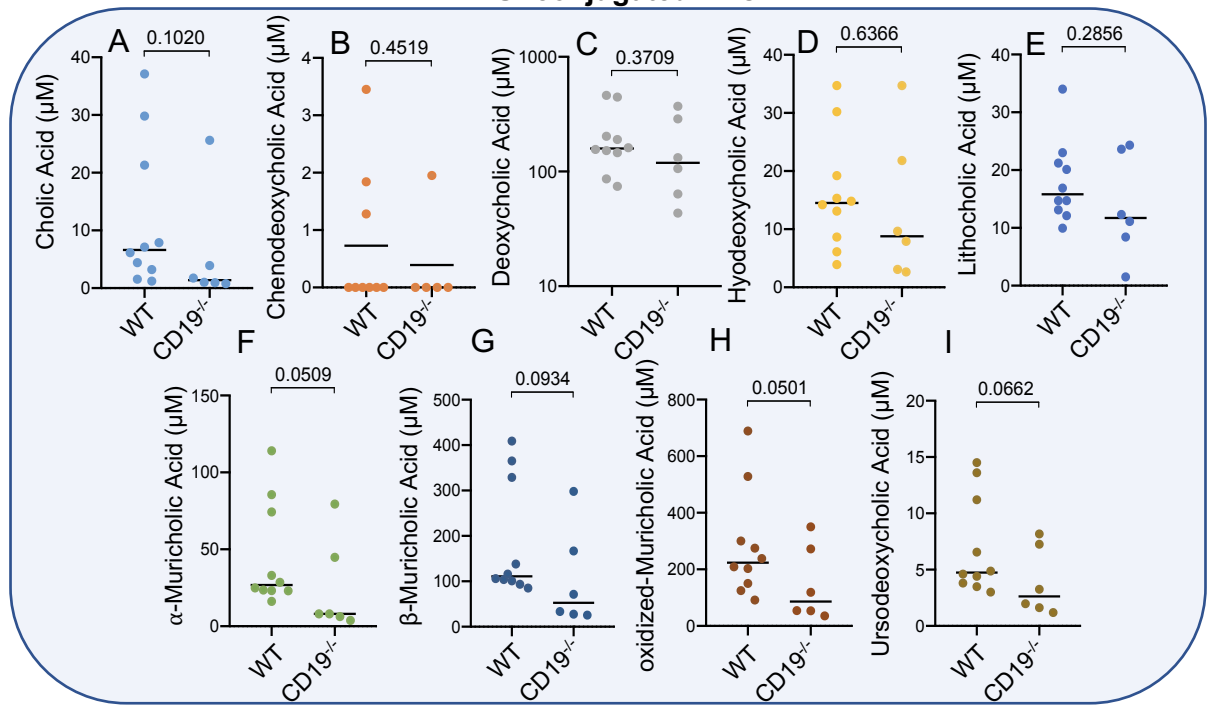

## Glycine-Conjugated BAs

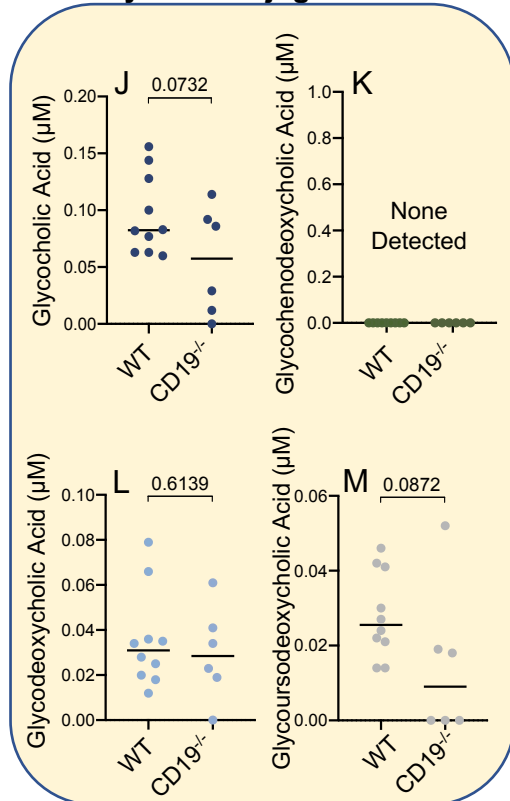

## Taurine-Conjugated BAs

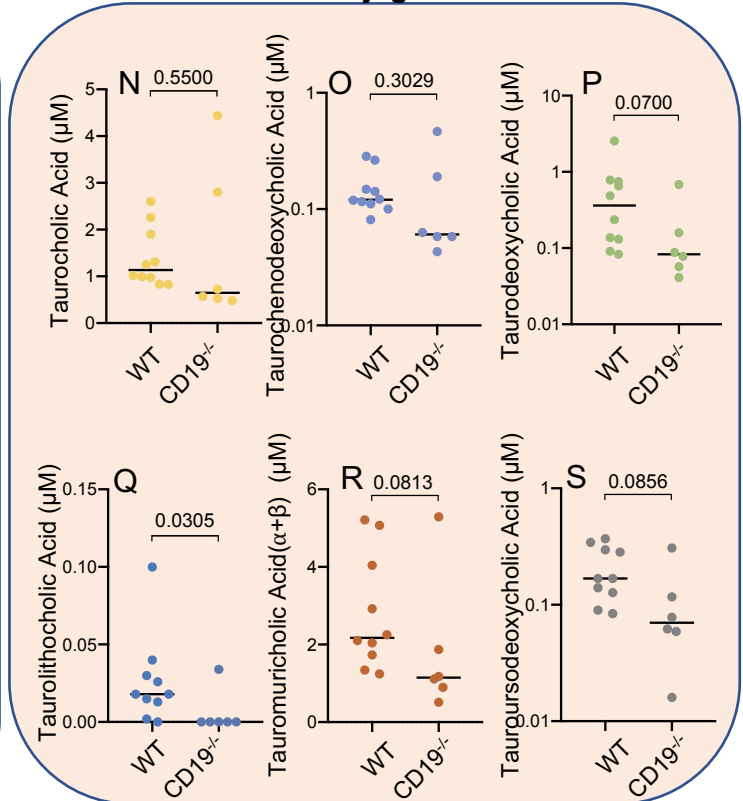

**Supplementary Figure S2. Pairwise comparison of nineteen fecal BAs between WT and CD19<sup>-/-</sup> mice.** Measured by UPLC-MS and shown as  $\mu\text{M}$  concentrations. (B, G, M, Q) Two-tailed unpaired Mann Whitney U test. (A, C, D, E, F, H, I, J, L, N, O, P, R, S) Two-tailed unpaired Student's t-test. Each comparison stands alone, no correction for multiple hypothesis testing.

### Unconjugated BAs

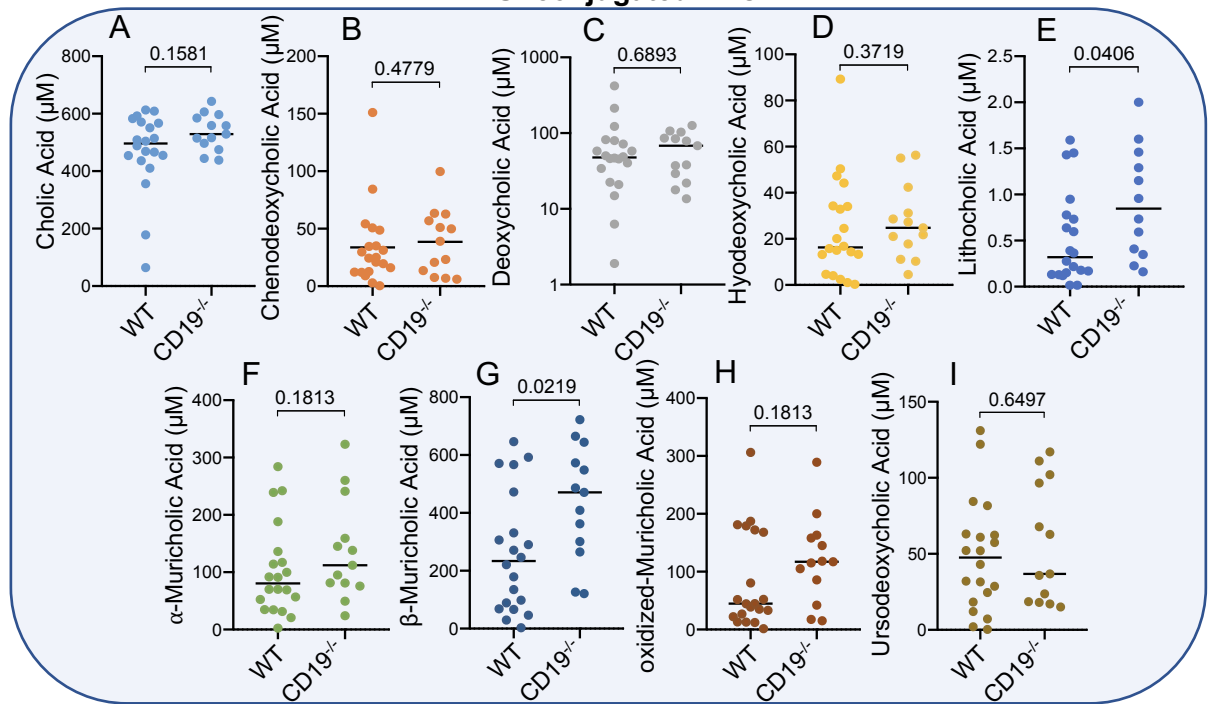

### Glycine-Conjugated BAs

### Taurine-Conjugated BAs

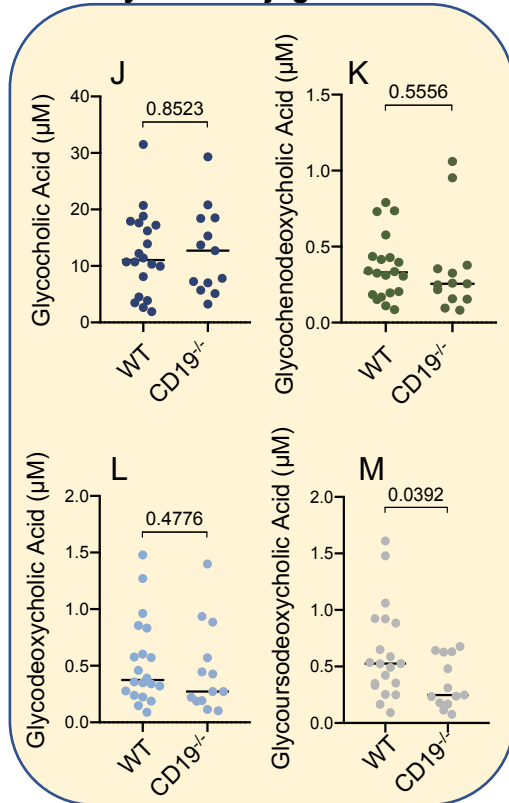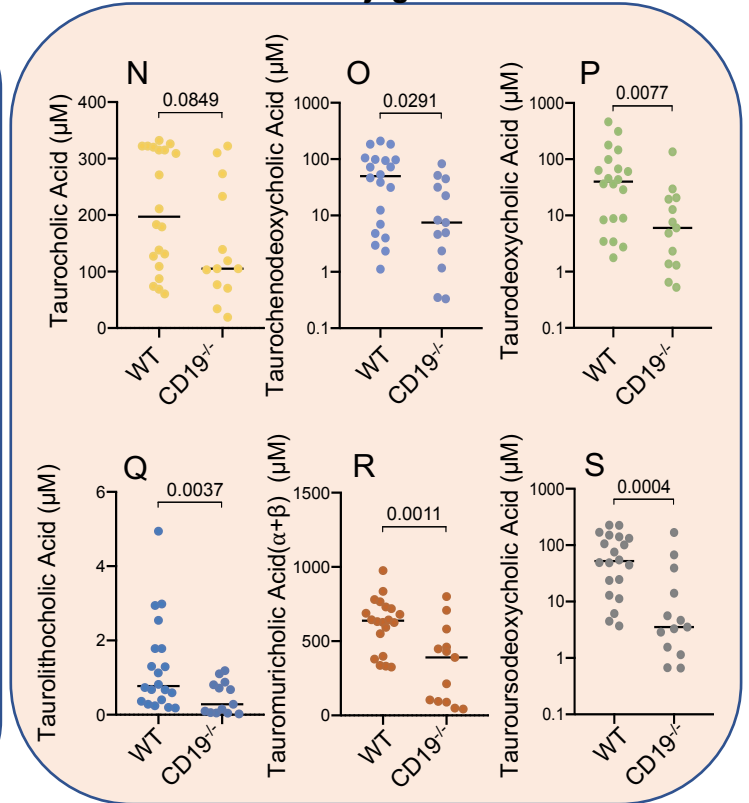

**Supplementary Figure S3. Pairwise comparison of nineteen BAs measured in SI contents of WT and CD19<sup>-/-</sup> mice.** Measured by UPLC-MS and shown as μM concentrations. (A, B, D, F, G, H, I, N, O) Two-tailed unpaired Mann-Whitney U test. (C, E, J, K, L, M, P, Q, R, S) Two-tailed unpaired Student's t-test. Each comparison stands alone, no correction for multiple hypothesis testing.

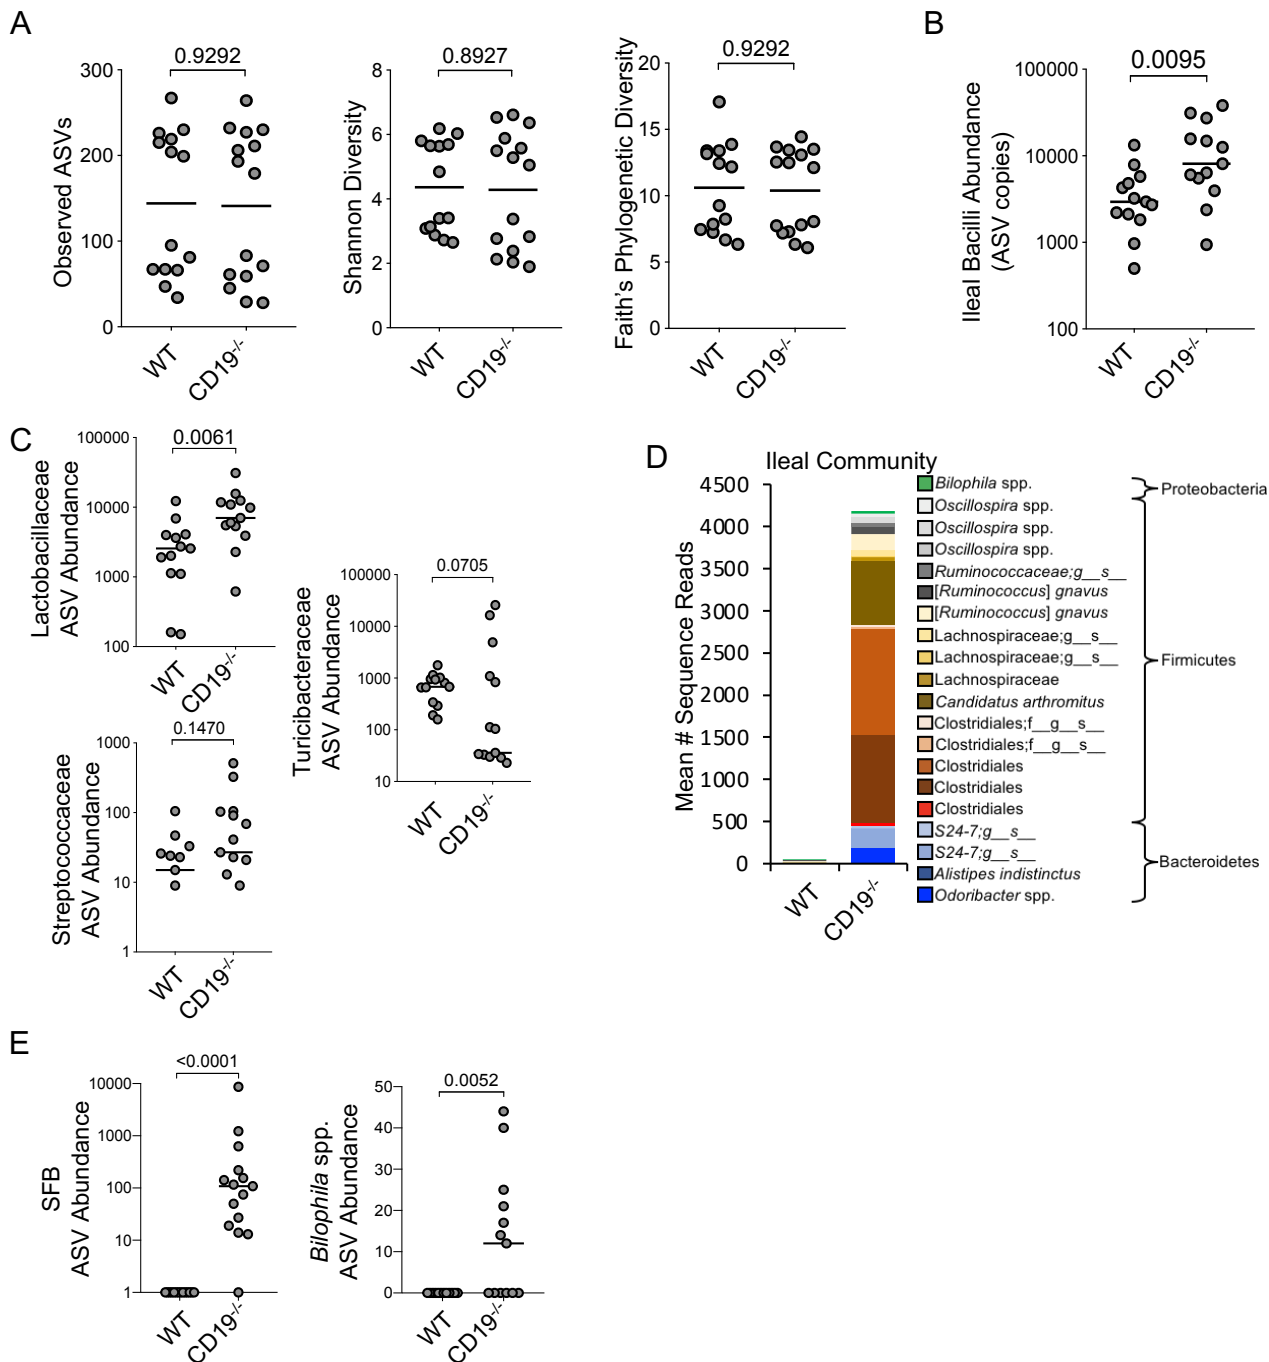

**Supplementary Figure S4. Microbiota compositional shifts in CD19<sup>-/-</sup> mice.** (A) Comparison of  $\alpha$ -diversity metrics between WT and CD19<sup>-/-</sup> mice is shown. (B) The relative abundance of Bacilli in WT and CD19<sup>-/-</sup> mice is shown. (C) Bacilli ASVs (driven primarily by expansion of members of the Lactobacillaceae family) are outgrown in CD19<sup>-/-</sup> mice. (D) CD19<sup>-/-</sup> have outgrowth of specific ASVs that are predominantly members of the Class Clostridia. (A, B, C, E) Two-tailed unpaired Mann-Whitney U tests. (D) Stacked bar-plots represent relative abundance of bacterial groups whose abundance was determined to be statistically significantly different based on Discrete False Discovery (DS-FDR) hypothesis testing. (A-E) Data in all plots representative of two replicate experiments.



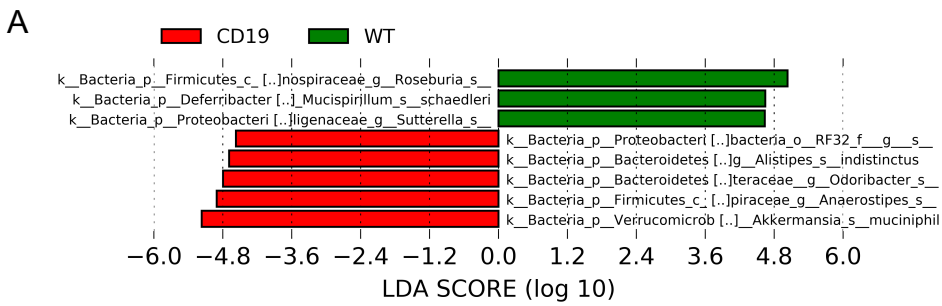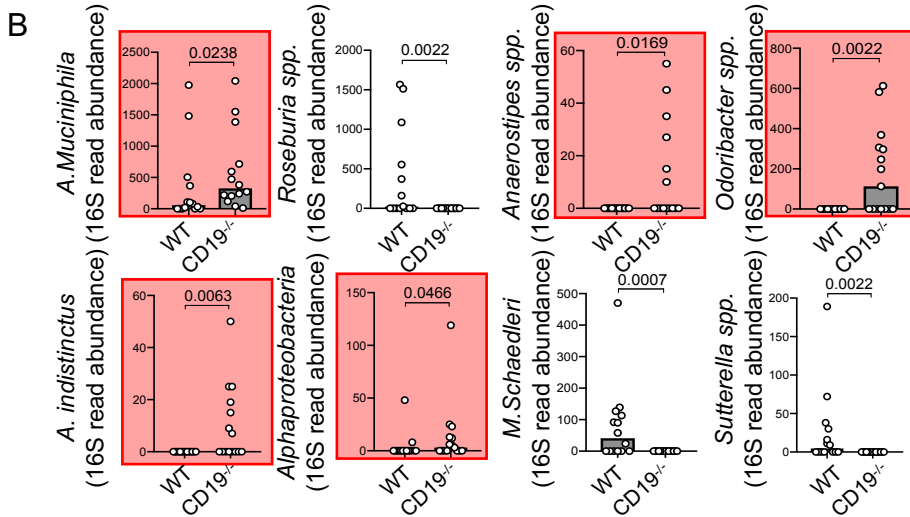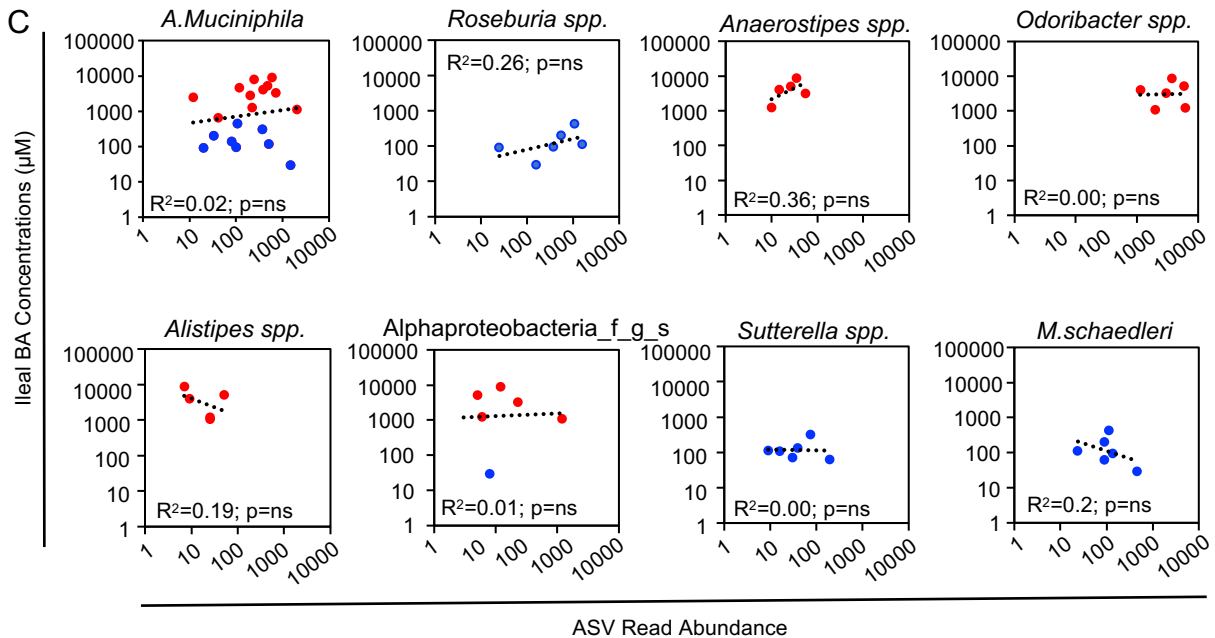

**Supplementary Figure S5. Results of Lefse/BA concentration analysis. (A)** Lefse analysis identified seven taxa that were significantly differentially enriched between WT and CD19<sup>-/-</sup> mice by linear discriminant analysis (LDA). LDA plot of Lefse analysis is shown. **(B)** Pairwise comparisons of read abundance for eight species identified as differentially enriched by Lefse. P-values derived from independent two-tailed unpaired Mann-Whitney U tests. Red boxes indicate anaerobic/facultative anaerobic bacteria. **(C)** Correlation analysis between ASV read abundance and ileal BA concentrations are shown. P-values shown are results of independent two-tailed one-way ANOVAs performed for each relationship.

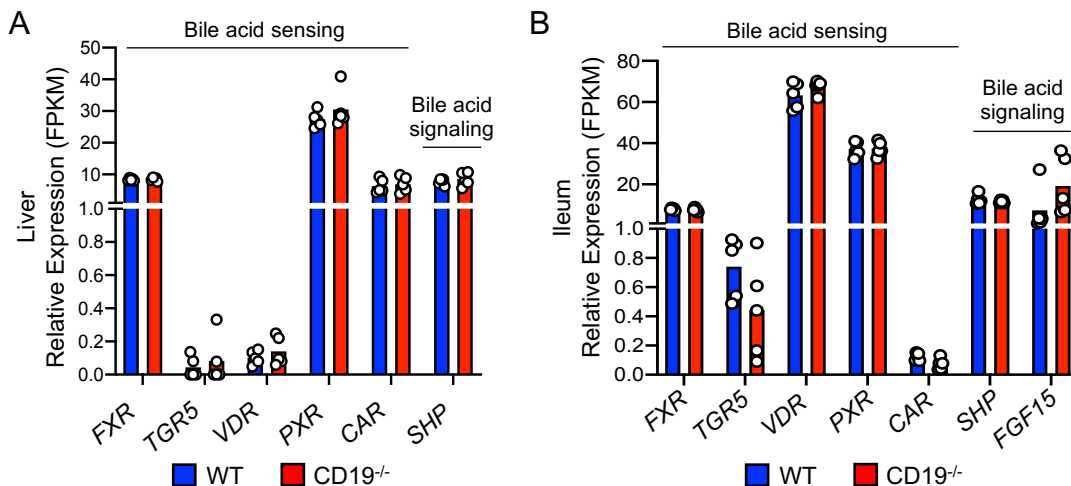

**Supplementary Figure S6. BA receptor and signaling molecule expression is not perturbed in CD19<sup>-/-</sup> mice.** (A) Comparison of read abundance (FPKM) of relevant liver BA receptors and downstream signaling molecules (*SHP*) between WT and CD19<sup>-/-</sup> mice is shown. (B) Comparison of read abundance (FPKM) of relevant ileal BA receptors and downstream signaling molecules (*SHP* and *FGF15*) between WT and CD19<sup>-/-</sup> mice is shown. (A and B) None of the genes shown are differentially regulated based on FDR significance cutoff of 0.05. Statistical results of quasi-likelihood hypothesis testing is provided in Supplementary Table T4 and Supplementary Table T6.

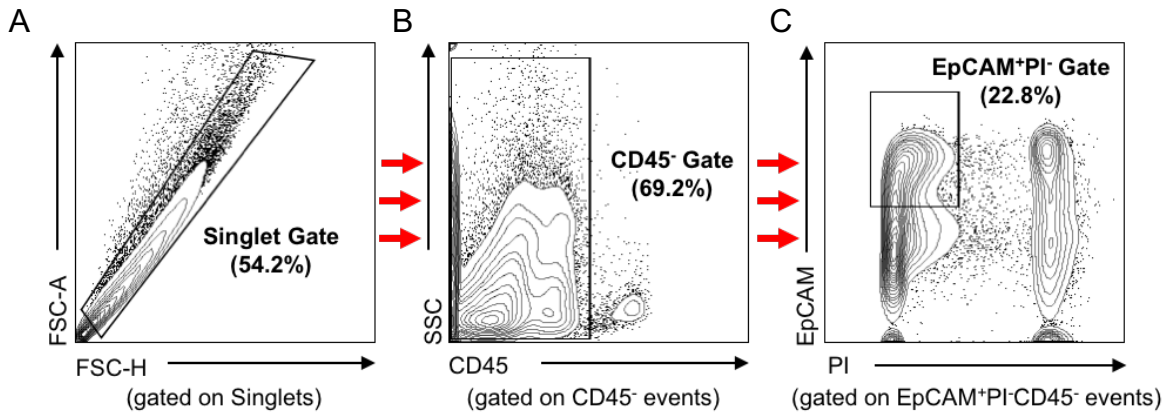

**Supplementary Figure S7. Gating rubric for enumerating apoptotic IECs in cell isolations derived from SI (ileal) tissue.** SI cells from the ileums of mice were isolated as described in methods section. Cells were stained with anti-mouse CD45, anti-mouse EpCAM, PI, and Annexin V. **(A)** We first gated on single cells, and then **(B)** gated on the CD45<sup>-</sup> population. **(C)** From the CD45<sup>-</sup> population we then gated on EpCAM<sup>+</sup>PI<sup>-</sup> events (living IECs). **(D)** The proportion of healthy (AnnV<sup>-</sup>) versus apoptotic cells (ie. AnnV<sup>+</sup>) were then gated. The same gating strategy was used for all IEC apoptosis experiments described in this manuscript.

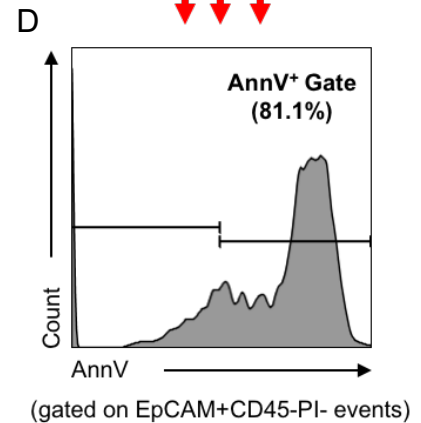

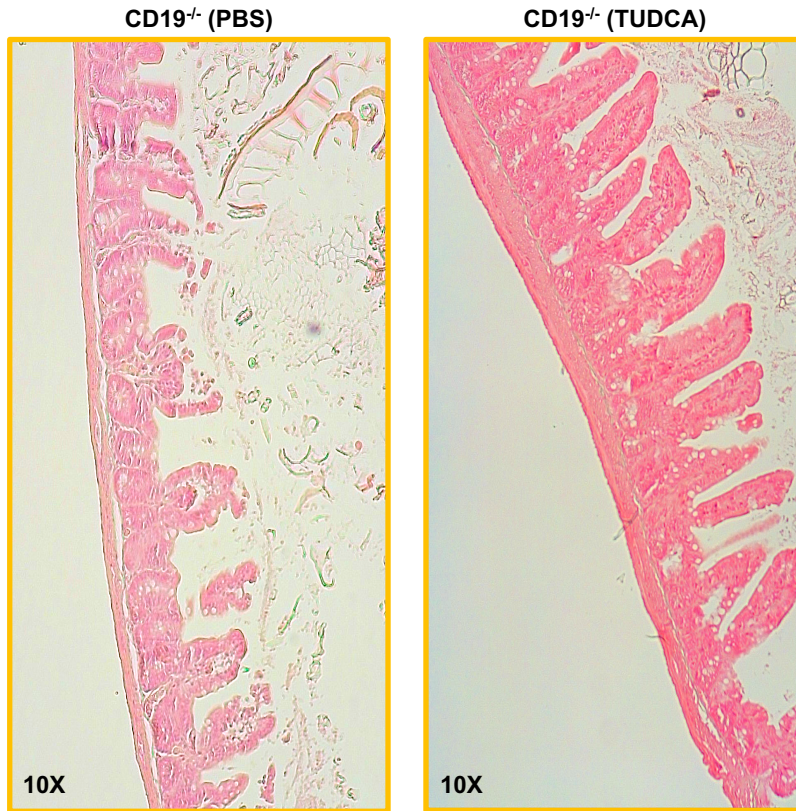

**Supplementary Figure S8. Histological comparison of ileal sections derived from CD19<sup>-/-</sup> mice treated with vehicle (1XPBS) or TUDCA.** Representative H&E stained sections of ileum (10X magnification) are shown for comparison. Images are representative of the degree of SI enteropathy observed in PBS- (n=10) and TUDCA-treated (n=9) CD19<sup>-/-</sup> mice across three replicate experiments.

A

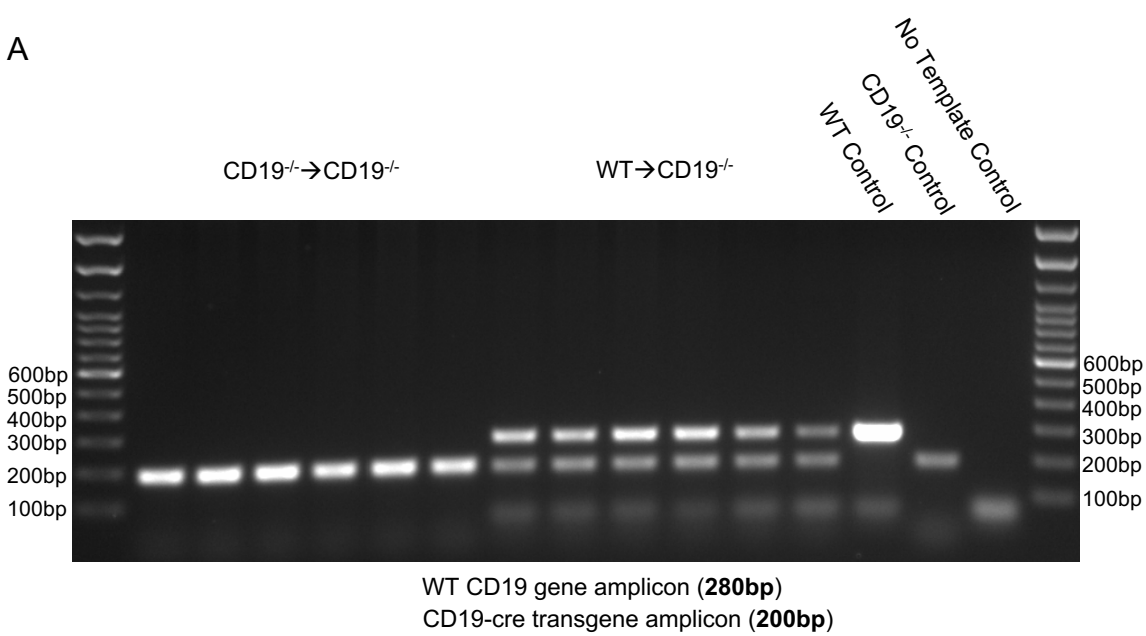

B

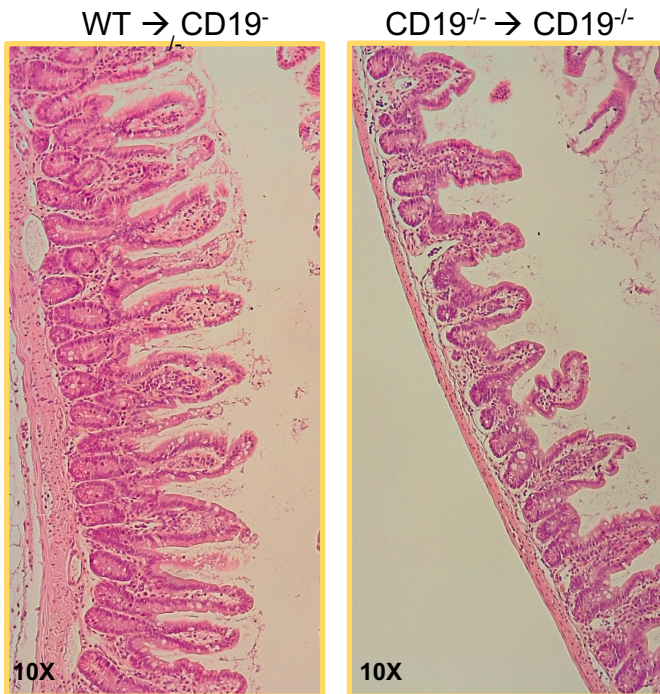

**Supplementary Figure S9. B cell transfer validation and histological comparison of ileal sections derived from CD19<sup>-/-</sup> mice receiving 10<sup>7</sup> B cells from either WT (WT→CD19<sup>-/-</sup>) or CD19<sup>-/-</sup> (CD19<sup>-/-</sup>→CD19<sup>-/-</sup>) donors. (A) Results of PCR detection of WT CD19 allele and CD19-cre transgene in CD19<sup>-/-</sup> mice receiving WT B cells (n=6 shown) or CD19<sup>-/-</sup> B cells (n=7 shown). DNA was extracted from ileal tissues of CD19<sup>-/-</sup> mice six weeks post B cell transfer and PCR was conducted to detect the presence of WT CD19 sequence amplicons, which indicates successful engraftment and homing of WT B cells to the gut of CD19<sup>-/-</sup> recipients. (B) Representative H&E stained sections of ileum (10X magnification) from CD19<sup>-/-</sup> mice receiving 10<sup>7</sup> B cells from WT (n=8) or CD19<sup>-/-</sup> donors (n=9) are shown. (a and B) Data is representative of the degree of SI enteropathy observed between experimental groups across two replicate experiments.**

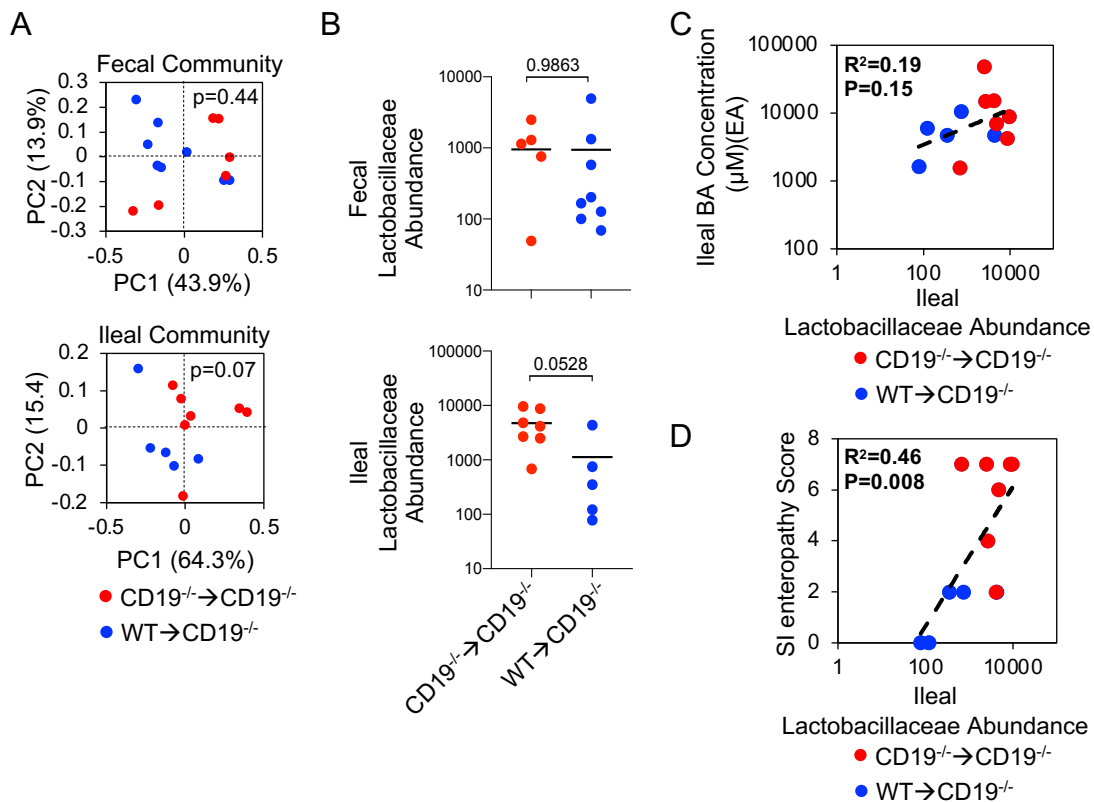

**Supplementary Figure S10. Results of 16S analyses of B cell transfer experiments. (A)** PcoA plots based on Bray-Curtis analysis of  $\beta$ -diversity between  $CD19^{-/-}$  mice receiving WT B cells ( $WT \rightarrow CD19^{-/-}$ ) or  $CD19^{-/-}$  B cells ( $CD19^{-/-} \rightarrow CD19^{-/-}$ ). **Fecal community:** PERMANOVA, pseudo-Fstat<sub>2,14</sub>=0.91,  $p=0.44$ . **Ileal community:** PERMANOVA, pseudo-Fstat<sub>2,12</sub>=2.75,  $p=0.07$ . **(B)** Pairwise comparisons of Lactobacillaceae abundance between adoptive transfer cohorts are shown. Two-tailed unpaired Students t-test. **(C)** The correlation between ileal Lactobacillaceae abundance and ileal BA concentration is shown. Two-tailed one-way ANOVA, Fstat<sub>1,10</sub>=2.40,  $p=0.15$ . **(D)** Correlation analysis of ileal Lactobacillaceae abundance and SI enteropathy score is shown. Two-tailed one-way ANOVA, Fstat<sub>1,10</sub>=10.81,  $p=0.008$ .



## Unconjugated BAs

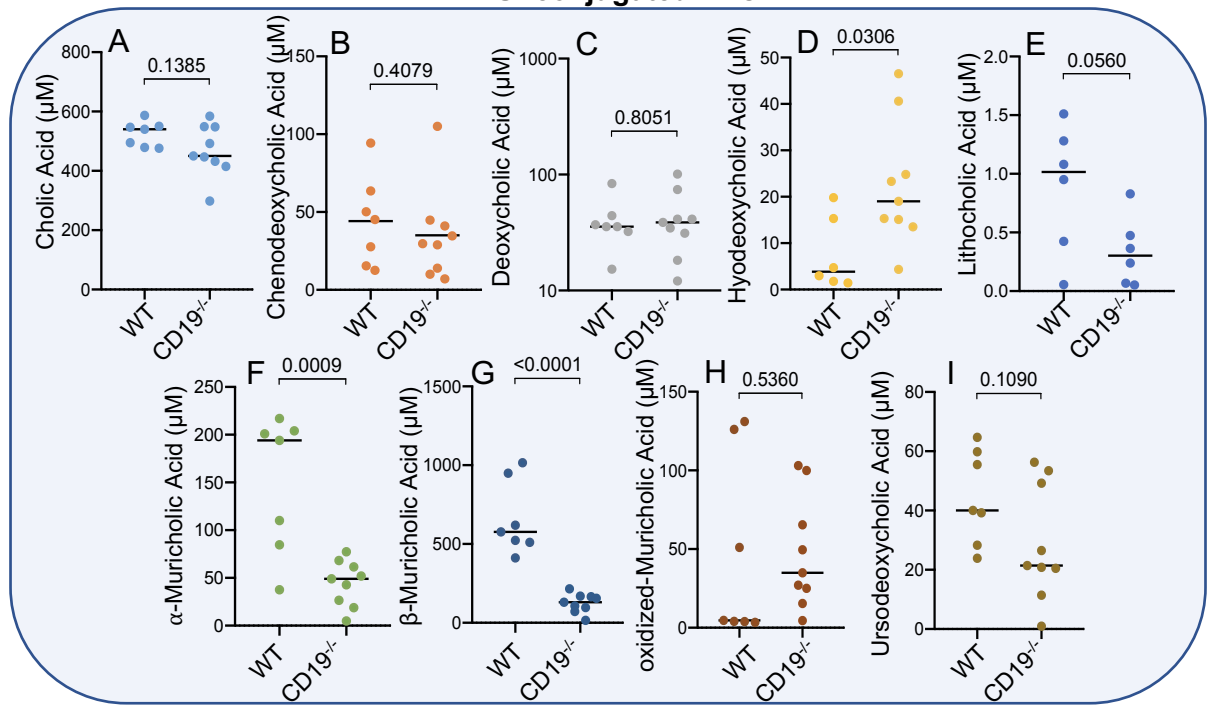

## Glycine-Conjugated BAs

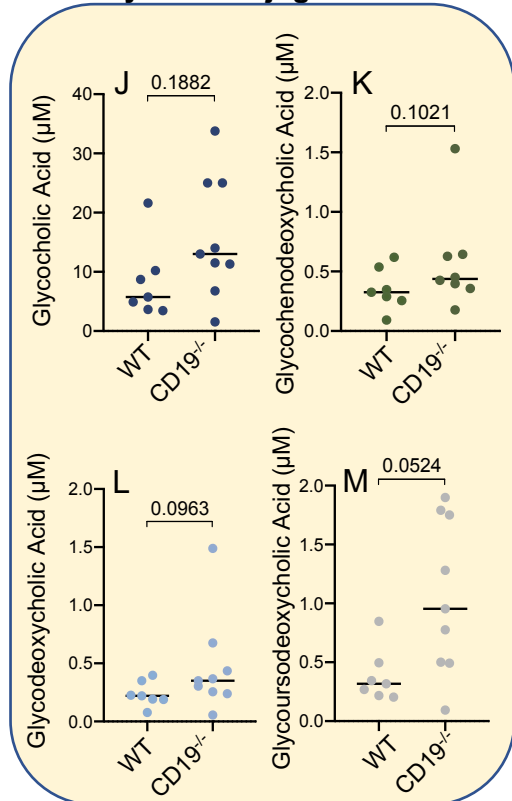

## Taurine-Conjugated BAs

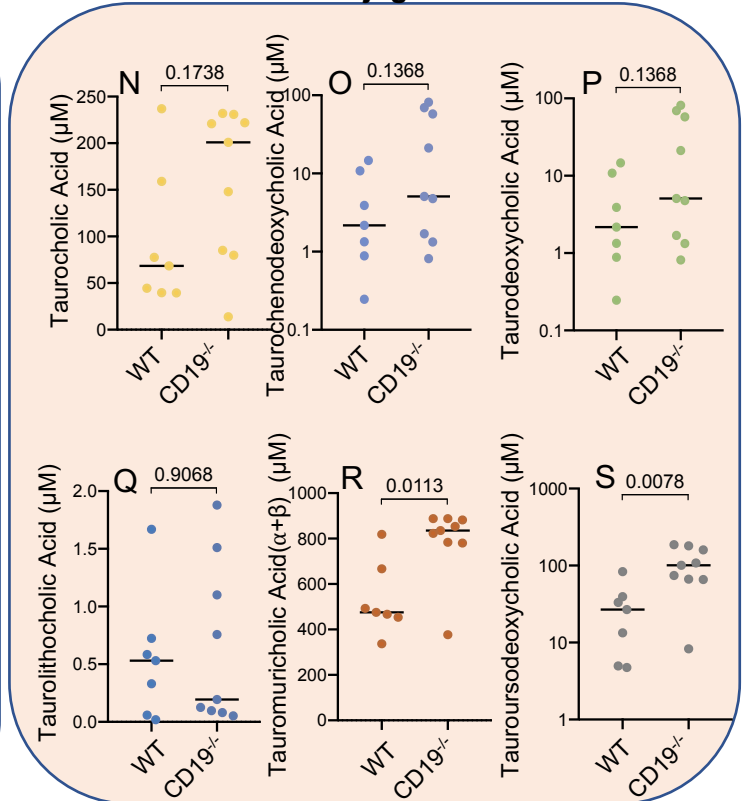

**Supplementary Figure S11. Pairwise comparison of nineteen ileal BAs between CD19<sup>-/-</sup> mice colonized with WT *B.theta* or  $\Delta$ bsh *B.theta*.** Measured by UPLC-MS and shown as  $\mu$ M concentrations. (B, H, L, N, R) Two-tailed unpaired Mann Whitney U test. (A, C, D, E, F, G, I, J, K, M, O, P, Q, S) Two-tailed unpaired Student's t-test. Each comparison stands alone, no correction for multiple hypothesis testing.



Colonized with WT *B.theta*

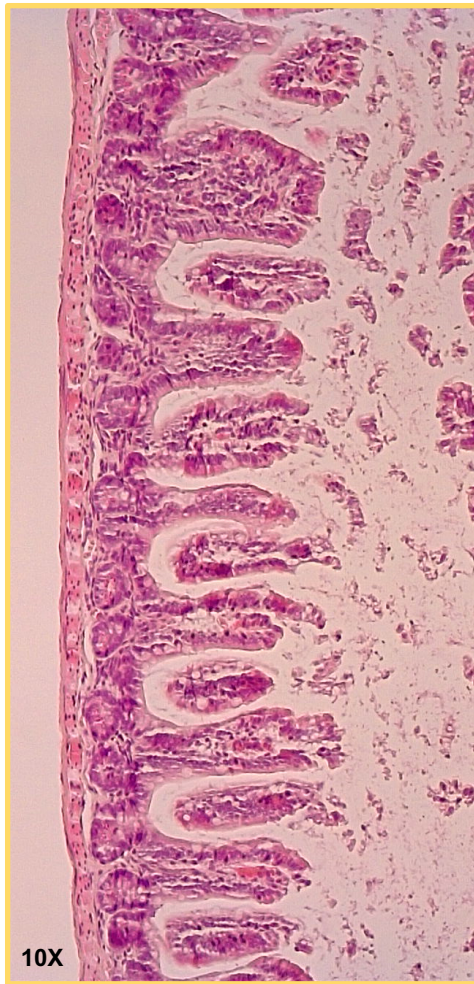

Colonized with  $\Delta$ bsh *B.theta*

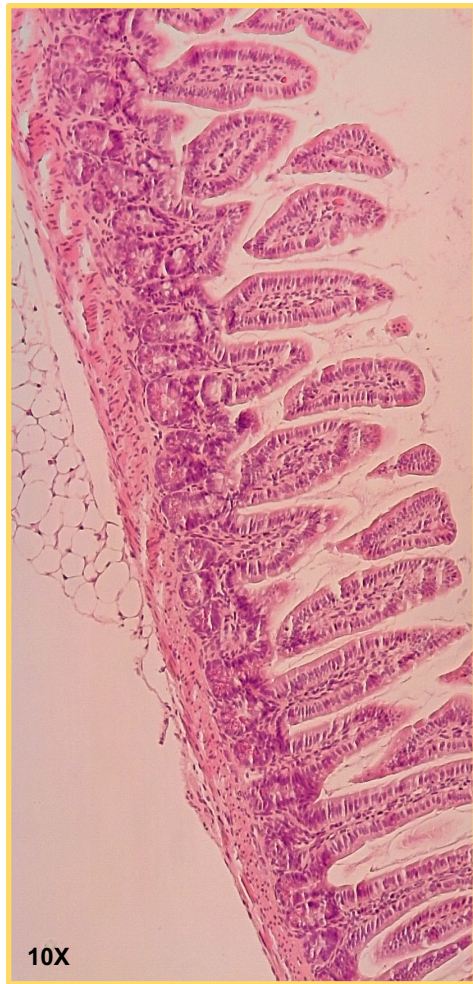

**Supplementary Figure S12. Histological comparison of ileal sections derived from CD19<sup>-/-</sup> mice colonized with WT *B.theta* or  $\Delta$ bsh *B.theta*.** Representative H&E stained sections of ileum (10X magnification) are shown for comparison. Images are representative of the degree of SI enteropathy observed in CD19<sup>-/-</sup> mice colonized with WT *B.theta* (n=7) or  $\Delta$ bsh *B.theta* (n=8). Data representative of 2 replicate experiments.

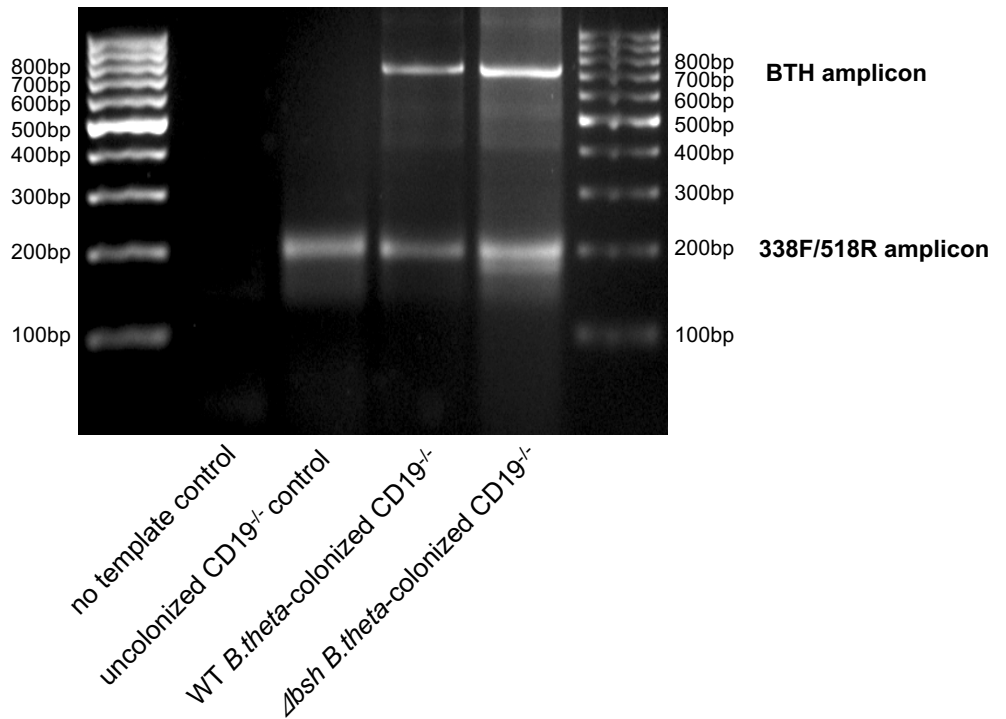

**Supplementary Figure S13.** Control gel depicting amplicon band size generated during qPCR assay used to determine the abundance of *Bacteroides thetaiotamicron* (both *WT B.theta* and  $\Delta$ *bsh B.theta* isogenic strains) and total Bacteria in colonized mice. The universal bacterial primer set 338F/518R generates an approximately 200bp amplicon and the *B.theta*-specific BTH primer set generates a 721bp amplicon. One mouse from each of the three conditions above were used to confirm expected band sizes for each amplicon.

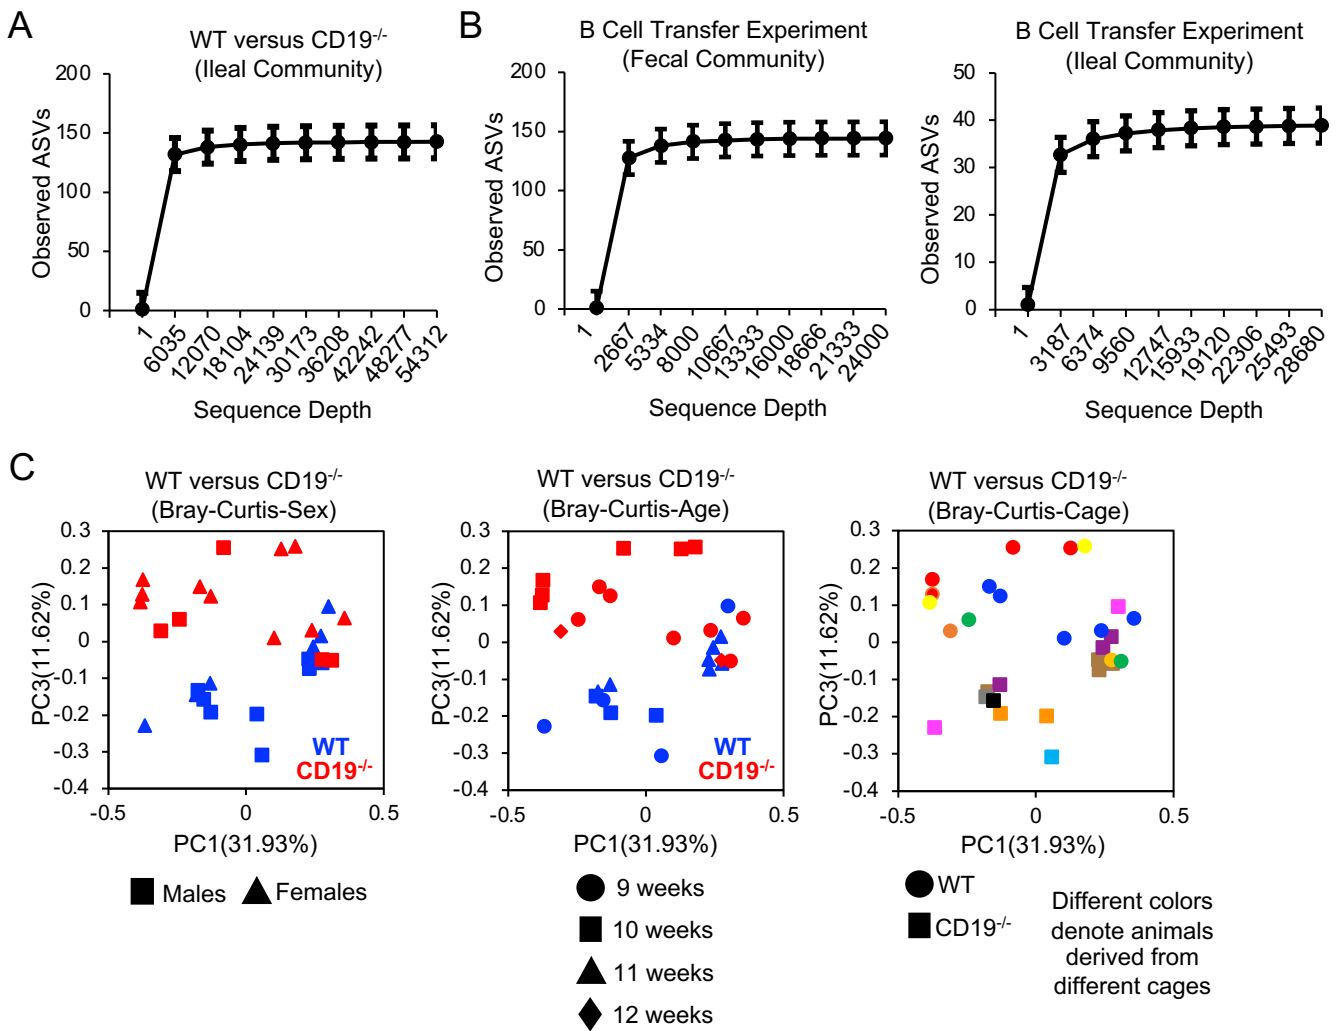

**Supplementary Figure S14. Metrics of microbiota sequencing experiments.** (A) Alpha-rarefaction plot demonstrating ASV diversity sampling as a function of sequence depth in the 16S microbiota profiling experiment comparing ileal microbial communities of WT and CD19<sup>-/-</sup> mice (n=29 mice). (B) Alpha-rarefaction plot demonstrating ASV diversity sampling as a function of sequence depth in the fecal (n=8 WT and n=6 KO mice) and ileal (n=5 WT and n=7 KO) datasets from CD19<sup>-/-</sup> B cell transfer 16S microbiota profiling experiments. (C) PcoA plots of Bray-Curtis estimates of  $\beta$ -diversity showing equal variation in sampling between genotypes. Colors in far right plot denote different breeding cages animals were derived from for use in experiments. Sex, age, and source cage do not explain observed differences between genotypes. (A-B) Data are presented as mean values  $\pm$  SEM .

**Supplementary Table 1. List of flow cytometry antibodies and solutions used in this study.**

| <b>Antibody</b>      | <b>Fluor</b> | <b>Clone</b> | <b>Vendor</b> | <b>Catalog #</b> | <b>Concentration</b> |
|----------------------|--------------|--------------|---------------|------------------|----------------------|
| Anti-mouse CD45      | APC.Cy7      | 30-F11       | BioLegend     | 103113           | 0.2 mg/ml            |
| Anti-mouse CD45      | APC          | 30-F11       | BioLegend     | 103115           | 0.2 mg/ml            |
| Anti-mouse CD326     | Alexa 488    | G8.8         | BioLegend     | 118210           | 0.5mg/ml             |
| Anti-mouse CD326     | PE.Cy7       | G8.8         | BioLegend     | 118215           | 0.2mg/ml             |
| Anti-mouse Ki-67     | APC          | 16A8         | BioLegend     | 652405           | 0.2mg/ml             |
| Annexin V            | APC          | -            | BioLegend     | 640920           | 8µg/ml               |
| Propidium Iodide     | -            | -            | BioLegend     | 421301           | 0.5mg/ml             |
| Zombie Green         | FITC         | -            | BioLegend     | 423111           | -                    |
| MitoSpy™NIR DiIC1(5) | APC          | -            | BioLegend     | 424807           | -                    |

**Supplementary Table 2. List of primers used in this study.**

| <b>Gene</b>               | <b>Primer Sequence</b>                                                                          | <b>Reference</b> |
|---------------------------|-------------------------------------------------------------------------------------------------|------------------|
| All Bacteria              | ( EUB-338f)(forward) 5'-ACTCCTACGGGAGGCAGCAG-3'<br>( EUB-518r)(reverse) 5'-ATTACCGCGGCTGCTGG-3' | 1                |
| <i>B.thetaiotaomicron</i> | (BTH-F) 5'-TGGAGTTTTACTTTGAATGGAC-3'<br>(BTH-R) 5'-CTGCCCTTTTACAATGGG-3'                        | 2                |

**Supplemental References**

- 1 Luo, G. *et al.* Historical Nitrogen Deposition and Straw Addition Facilitate the Resistance of Soil Multifunctionality to Drying-Wetting Cycles. *Applied and environmental microbiology* **85**, doi:10.1128/AEM.02251-18 (2019).
- 2 Teng, L. J. *et al.* PCR assay for species-specific identification of *Bacteroides thetaiotaomicron*. *J Clin Microbiol* **38**, 1672-1675 (2000).

## **Supplementary Note 1: UPLC-MS Methods**

# UPLC/MS-MS Analysis of Mouse Ileal Content Samples Using the Biocrates Bile Acids Kit

*In collaboration with Dr. Jason Kubinak,  
University of South Carolina School of Medicine*

**December 11, 2019**

Objective: Measure the levels of selected bile acids in 40 mouse ileal content samples using the Biocrates Bile Acids kit.

Duke Proteomics and Metabolomics Core Facility Contributors: Lisa St. John-Williams (sample preparation, data collection, data analysis, report writing), Will Thompson (study design, scientific oversight, report writing), and Arthur Moseley (scientific oversight, report writing).

## Introduction:

The Biocrates Bile Acids assay quantifies 20 bile acids, 16 of which are normally detected in human plasma. Three of the bile acids measured are murine-specific (MCA(a), MCA(b), MCA(o)). The bile acids kit includes all requisite calibration standards, internal standards, and QC samples. The use of these standards according to the detailed analysis protocol, which was validated in Biocrates' lab in Austria, assures assay harmonization and standardization within a project, across projects, and across laboratories. Sample analysis of bile acids are performed by a UPLC (ultra-high pressure liquid chromatography) tandem mass spectrometric method using a reversed phase analytical column for analyte separation (LC/MS-MS, **Figure 1**). Selective analyte detection is accomplished by use of a triple quadrupole tandem mass spectrometer operated in Multiple Reaction Monitoring (MRM) mode, in which specific precursor to product ion transitions are measured for every analyte and stable isotope labeled internal standard.





The seven calibration standards provided in the Biocrates Bile Acids kit were used for highly accurate and reproducible quantitation of the bile acids. **Figure 2** shows a schematic and representative example of how the calibration curve was used to back-calculate QC and sample concentrations. Calibration standards were fit with a linear regression using  $1/x^2$  weighting.

**Figure 2.** Schematic depicting the quantitative methodology used in the Biocrates Bile Acids kit.

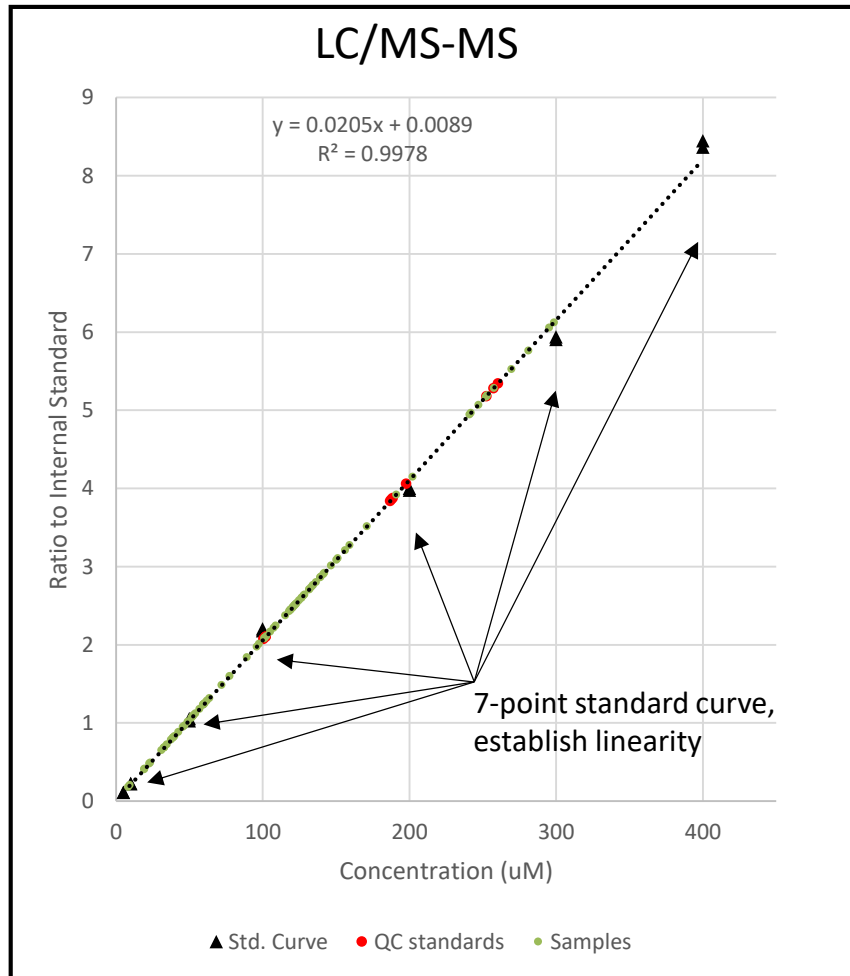

The samples were prepared in a 96-well plate format using the layout shown in **Figure 3**.

**Figure 3.** Schematic depicting the 96-well plate layout for the analysis of study samples including: blanks, calibration standards, and QC samples from Biocrates. Two additional QC samples were analyzed: the DPMCF Global Reference QC and the sample pool QC (SPQC).

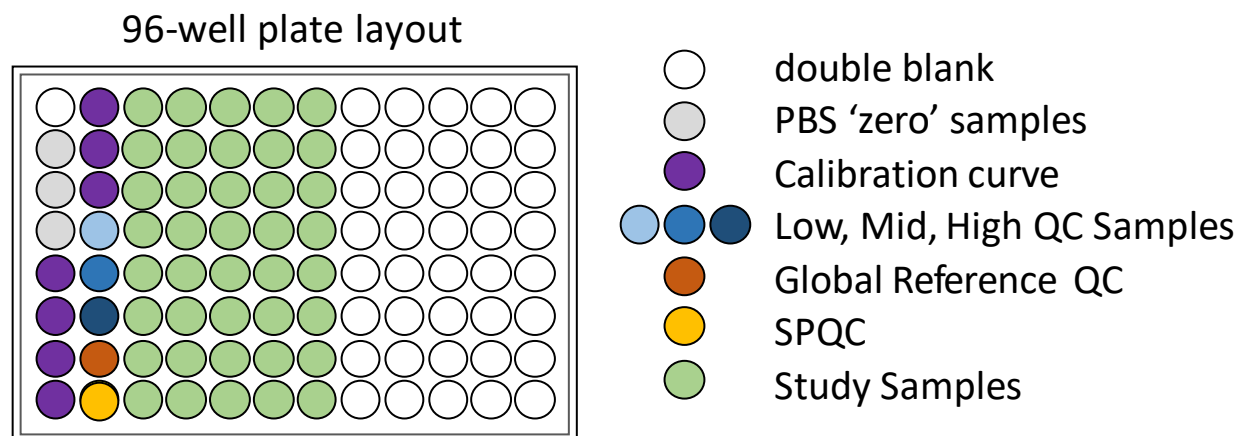

#### Sample Preparation:

Weighed ileal samples were provided frozen in Precellys soft tissue homogenizing CK14 tubes (Bertin Technologies, Montigny-le-Brettonneux, France). Extraction buffer was prepared by adding 6.8 mL Ethanol to 0.96 mL water and 0.24 mL 100mM pH 7.4 phosphate buffer. Three volumes of extraction buffer were added to each sample 3:1 volume:weight. (For example, 600  $\mu$ L extraction buffer was added to 200 mg sample.) Samples were then homogenized using three 10-second pulses in the Precellys Evolution between which samples were chilled using the Cryolys cooling system. The samples were then sonicated in an ice water bath for 5 minutes. The homogenized samples were stored at -80C until the day of extraction with the Bile Acids kit.

On the day of bile acids sample extraction the homogenized samples were thawed and vortexed. The samples were then centrifuged at 10000 rcf for 10 minutes in a refrigerated (4C) centrifuge then stored on ice until addition to the bile acids kit plate.

Samples were prepared using the Bile Acids kit (Biocrates Innsbruck, Austria) in strict accordance with their detailed protocol. Addition of 10  $\mu$ L of the supplied internal standard solution to each well of the 96-well extraction plate was followed by drying under a gentle stream of nitrogen. Ileal samples, blanks, calibration standards, and QCs were added in 10  $\mu$ L aliquots to the appropriate wells. The plate was then dried under a gentle stream of nitrogen for 10 minutes. The samples were eluted with methanol then diluted with water for UPLC analysis.

A pool of the 40 ileal homogenates was created using equal volumes of all ileal samples. The pooled sample was prepared and analyzed in the same way as the study samples. From the bile acids kit plate this sample was injected once before, once during, and once after the study samples in order to measure the performance of the assay across the sample cohort. The results from these pools can be used to assess potential batch effects. The order of injection of the samples is shown in **Figure 4**.

**Figure 4.** Schematic depicting the injection order of the samples for UPLC analysis.

## Sample Injection Sequence

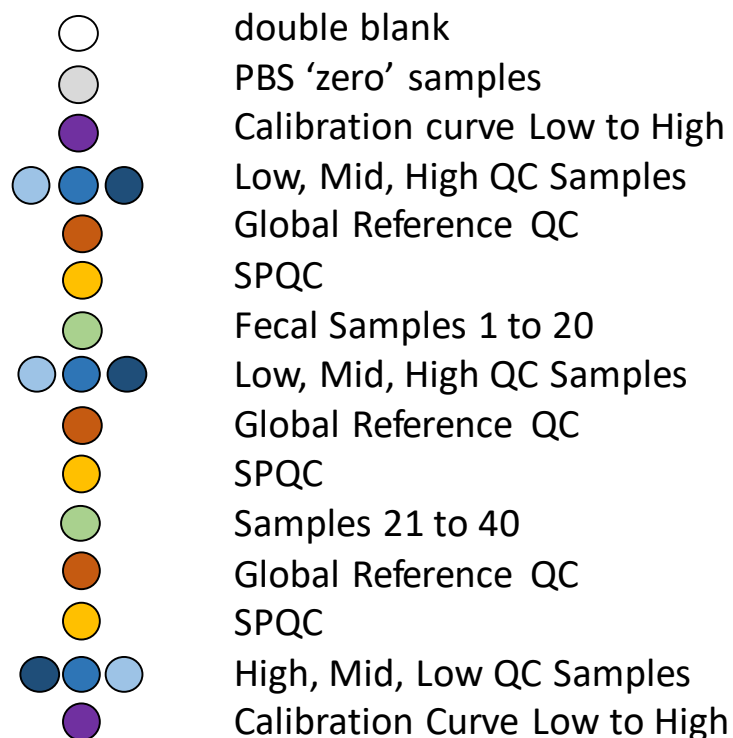

### Sample Analysis:

UPLC separation of bile acids was performed using a Waters Acquity UPLC (Milford, MA) with a proprietary reversed-phase UPLC column and guard column provided by Biocrates. Analytes were separated using a gradient from 10mm ammonium acetate, 0.015% formic acid in water to 10mm ammonium acetate, 0.015% formic acid in acetonitrile (65%) and methanol (30%). Total UPLC analysis time was approximately 6 minutes per sample. Using electrospray ionization in negative ion mode, samples were introduced directly into a Xevo TQ-S triple quadrupole mass spectrometer (Waters) operating in the Multiple Reaction Monitoring (MRM) mode. MRM transitions (compound-specific precursor to product ion transitions) for each analyte and internal standard were collected over the appropriate

retention time. The UPLC-MS/MS data were imported into Waters application TargetLynx™ for peak integration, calibration, and concentration calculations. The UPLC-MS/MS data from TargetLynx™ were analyzed using Biocrates Met/IDQ™ software.

### **Data Return Document Descriptions**

A number of documents have been added to the Express Data Repository for Project 5496 including this sample analysis summary. A link to the repository is included here. A description of the data spreadsheets follows the link.

[https://discovery.genome.duke.edu/express/resources/5496/.](https://discovery.genome.duke.edu/express/resources/5496/)

### **5496 Bile Acids Data.xlsx**

This is an Excel workbook containing five worksheets. The first worksheet (5496 Bile Acids Data nmol\_g) contains the calculated concentration data for the ileal homogenates normalized to tissue weight (nmol/g) acquired in the study for bile acids, according to Equation 1 below.

$$\frac{\text{nmol}}{\text{g}} = \frac{\text{uM concentration}}{\text{tissue factor} \left(\frac{\text{g}}{\text{L}}\right)} * 1000 \quad (1)$$

The barcode number of the plate is listed in column A. The Sample Bar Code number (column B) is assigned to every sample by the Biocrates Met/IDQ™ software. The Sample Identification Number in column G is the unique sample identifier assigned by the Proteomics and Metabolomics Sample Submission System. Column D lists the Customer Sample Identification information which were listed on every sample tube provided for analysis. The results for the 5496 SPQC are in rows 48 through 50. Row 52 has the %CV for the study pool sample results. It is our recommendation that if the precision of the

pool sample (as measured by the %CV) for a particular analyte is greater than 25%, then the data for that analyte in the study samples should be flagged for removal from the dataset because of imprecision. Additionally, best practice suggests that analytes which have more than 40% missing values in the study samples should be flagged for potential removal from the dataset because of excess missing values. This last point may not be the case in a test-control study, where either test or control subjects/samples may be below the LOD. In this case, replacement of missing values with LOD/2 is recommended.

Worksheet 2 (Tissue Factors) shows the weight of each sample in grams, the volume of extraction buffer added in liters, and the tissue correction factor in grams/liter for each sample.

The third worksheet (5496 Bile Acids Data  $\mu\text{M}$ ) contains the calculated concentration data ( $\mu\text{M}$ ) acquired in the study for bile acids. The second row in this worksheet lists the analytes measured and the status for each one. Row 4 lists the lower limit of detection (LOD) for the analytes. The Biocrates-defined lowest calibration standard and highest calibration standard are listed in Rows 5 and 6. The barcode number of the plate on is listed in column A. The Sample Bar Code number (column B) is assigned to every sample by the Biocrates *Met/DQ*<sup>TM</sup> software. The Sample Identification Number in column G is the unique sample identifier assigned by the Proteomics and Metabolomics Sample Submission System. Column D lists the Customer Sample Identification information which were listed on every sample tube provided for analysis.

Table 1 below lists the unique plate barcodes assigned by the *Met/DQ*<sup>TM</sup> software for the LC/MS-MS analysis.

**Table 1. Plate Barcodes**

| Plate Number | Plate Barcode for UPLC/MS-MS Analysis. |
|--------------|----------------------------------------|
| 1            | 1034741866-1                           |

**Table 2** below shows the bile acid analytes measured in this kit, the defined lower limit of detection, calibration range (given as lowest calibration standard to highest calibration standard), the number of study samples that each analyte was measured in (above the LOD), the average measured value for each analyte in the 5496 SPQCs and their respective %CVs. If needed, the 5496 SPQC data from each plate could be utilized to control for batch effects during statistical analysis, however since this study was performed on a single plate, this is not applicable.

| Bile Acid                         | Abbreviation | LOD (µM) | Lowest CS (µM) | Highest CS (µM) | Ileal values >LOD (n) | Average SPQC (µM) | %CV SPQC | Ileal values >ULOQ |
|-----------------------------------|--------------|----------|----------------|-----------------|-----------------------|-------------------|----------|--------------------|
| Cholic acid                       | CA           | 0.004    | 0.03           | 75              | 40                    | 489               | 5.1      | 39                 |
| Chenodeoxycholic acid             | CDCA         | 0.005    | 0.02           | 30              | 40                    | 28.1              | 1.6      | 14                 |
| Deoxycholic acid                  | DCA          | 0.006    | 0.02           | 10              | 40                    | 49.7              | 1.2      | 37                 |
| Glycocholic acid                  | GCA          | 0.003    | 0.03           | 75              | 40                    | 14.4              | 1.1      |                    |
| Glycochenodeoxycholic acid        | GCDCA        | 0.01     | 0.02           | 20              | 37                    | 0.381             | 0.9      |                    |
| Glycodeoxycholic acid             | GDCA         | 0.01     | 0.01           | 10              | 40                    | 0.430             | 4.0      |                    |
| Glycolithocholic acid             | GLCA         | 0.006    | 0.01           | 5               | 8                     | NA                | NA       |                    |
| Glycoursodeoxycholic acid         | GUDCA        | 0.006    | 0.01           | 10              | 40                    | 0.608             | 3.7      |                    |
| Hyodeoxycholic acid               | HDCA         | 0.005    | 0.01           | 5               | 39                    | 20.9              | 34.1     | 29                 |
| Lithocholic acid                  | LCA          | 0.002    | 0.01           | 5               | 33                    | 0.854             | 9.9      |                    |
| Muricholic acid, alpha            | MCA(a)       | 0.008    | 0.005          | 5               | 40                    | 104               | 6.3      | 38                 |
| Muricholic acid, beta             | MCA(b)       | 0.008    | 0.01           | 10              | 40                    | 324               | 4.1      | 39                 |
| Muricholic acid, omega            | MCA(o)       | 0.007    | 0.005          | 5               | 40                    | 75.7              | 4.6      | 33                 |
| Taurocholic acid                  | TCA          | 0.008    | 0.02           | 50              | 40                    | 225               | 3.8      | 33                 |
| Taurochenodeoxycholic acid        | TCDCA        | 0.005    | 0.01           | 20              | 40                    | 58.9              | 4.2      | 18                 |
| Taurodeoxycholic acid             | TDCA         | 0.001    | 0.01           | 10              | 40                    | 58.4              | 3.1      | 18                 |
| Taurolithocholic acid             | TLCA         | 0.001    | 0.01           | 5               | 40                    | 0.980             | 8.9      |                    |
| Tauromuricholic acid (alpha+beta) | TMCA(a+b)    | 0.001    | 0.01           | 10              | 40                    | 764.3             | 10.1     | 39                 |
| Tauroursodeoxycholic acid         | TUDCA        | 0.001    | 0.01           | 15              | 40                    | 80.0              | 4.5      | 26                 |
| Ursodeoxycholic acid              | UDCA         | 0.002    | 0.02           | 30              | 40                    | 40.6              | 5.3      | 17                 |

**Table 2.** Analysis characteristics of the Bile Acids assay, and measured values for the study pool QCs. The value for the SPQC sample represents the biological mean concentration of all samples in the study, and is helpful for assessment of the measured precision for the analyte, and whether or not the sample average was within the calibration range. Red highlighted analytes either had an average measured value (SPQC) which was below the lower limit of detection (<LOD) or were measurable in less than half of the samples. A significant number of samples had analyte concentrations above the upper limit of quantitation (ULOQ) as indicated.

In the data documents **5496 Bile Acids Data.xlsx** and **5496 Bile Acids QC Data.xlsx** the concentration data ( $\mu\text{M}$ ) are coded as shown below in Table 3 in order to allow presentation of additional information regarding data quality:

**Table 3. Key to the Analyte Status Columns Used in the Data Table 5496 Bile Acids Study Sample Data.xlsx**

|                                                   |                                                                                                                                                                                                                                                   |
|---------------------------------------------------|---------------------------------------------------------------------------------------------------------------------------------------------------------------------------------------------------------------------------------------------------|
| Valid                                             | Calculated concentrations are based on a standard curve of the analyte listed. (Not all analytes are contained in the calibration standards provided by Biocrates. Therefore, results for some analytes will be coded as Semi-Quantitative.)      |
| <Lowest CS: Lowest Calibration Standard>Value>LOD | The value is greater than the LOD but less than the Biocrates-defined lowest calibration standard. These values should be considered reliable except for analytes for which the %CV observed for the pooled sample was greater than 25%.          |
| >Highest CS                                       | Greater than the highest calibration standard                                                                                                                                                                                                     |
| <LOD                                              | Less than the Lower Limit of Detection. The LODs were given by Biocrates, and were not determined using FDA guidelines or a Waters TQ-S mass spectrometer.                                                                                        |
| Internal Standard out of range                    | The internal standard peak area for this analyte was slightly lower than the normal range. <b>NOTE:</b> There was no adverse effect on the data due to the lower level of internal standard detected. (Not all analytes have internal standards.) |
| No Interception                                   | No peak was detected in the chromatogram at the appropriate retention time for this analyte.                                                                                                                                                      |

The fourth worksheet in the workbook contains the  $\mu\text{M}$  study sample data with the Status columns removed.

The fifth worksheet in the workbook contains a statistical summarization of the  $\mu\text{M}$  data from the Biocrates Met/DQ™ application. The Analyte Statistics worksheet lists these summary statistics (Min  $\mu\text{M}$ , Max  $\mu\text{M}$ , Mean  $\mu\text{M}$ , Median  $\mu\text{M}$ , 25<sup>th</sup> Percentile  $\mu\text{M}$ , 75<sup>th</sup> Percentile  $\mu\text{M}$ , STD  $\mu\text{M}$ , MAD  $\mu\text{M}$ , Skewness, Kurtosis, CV [%], CVRobust [%]) by metabolite for all of the samples. The number of results (e.g. samples with usable data) included for each statistical calculation is indicated by “n” in Column C.

### Study Samples with Calculated Concentrations Greater than the Highest Calibration Standard

In this study some samples had calculated concentration values that were greater than the highest calibration standard for CA, CDCA, DCA, HDCA, MCA(a), MCA(b), MCA(o), TCA, TCDCA, TDCA, TUDCA, and TMCA(a+b). **These samples have status “>Highest CS” in the data spreadsheet on the third worksheet.** The affected extracted samples were diluted by adding 10  $\mu\text{L}$  extract to 190  $\mu\text{L}$  1:1 (v/v) Methanol:Water and reinjected. Some chromatograms for CA, TCA and TMCA(a+b) were still saturated after dilution. Please note that these results for the listed analytes should be considered semi-quantitative since they are above the linear calibration range for the assay. A table of the samples and analytes with saturated chromatograms and observed concentrations follows in **Table 4**. Note that in the cases where “NA” is shown in Table 4, the measurement for that analyte was within the calibration range and thus does not present an issue with quantification.



| DPMSR Sample Identification | Customer Sample Identification |                                   | CA (µM) | CDCA (µM) | DCA (µM) | HDCA (µM) | MCA (a) (µM) | MCA (b) (µM) | MCA (o) (µM) | TCA (µM) | TCD CA (µM) | TDCA (µM) | TMCA (a+b) (µM) | TUDCA (µM) | UDCA (µM) |
|-----------------------------|--------------------------------|-----------------------------------|---------|-----------|----------|-----------|--------------|--------------|--------------|----------|-------------|-----------|-----------------|------------|-----------|
|                             |                                | Highest Calibration Standard (µM) | 75      | 30        | 10       | 5         | 5            | 10           | 5            | 50       | 20          | 10        | 10              | 15         | 30        |
|                             |                                | Average SPQC                      | 489     | 28.1      | 49.7     | 20.9      | 103.8        | 323.7        | 75.7         | 224.7    | 58.9        | 58.4      | 764.3           | 80.0       | 40.6      |
| 52541                       | CD248                          |                                   | 492     | NA        | 41.3     | 23.3      | 18.9         | 97.2         | 49.5         | 148      | NA          | NA        | 780             | 74.2       | NA        |
| 52542                       | CD249                          |                                   | 432     | NA        | 12.1     | 4.36      | 4.86         | 15.6         | 4.54         | 231      | 117         | 69.4      | 854             | 180        | NA        |
| 52543                       | CD250                          |                                   | 584     | NA        | 31.2     | 15.1      | 49.1         | 169          | 103          | 79.8     | NA          | NA        | 823             | 66         | NA        |
| 52544                       | CD251                          |                                   | 548     | NA        | 34.6     | 13.5      | 26.6         | 107          | 65.4         | 201      | NA          | NA        | 882             | 108        | NA        |
| 52545                       | CD252                          |                                   | 549     | 41.1      | 38.7     | 24.8      | 51.9         | 166          | 99.9         | 85.1     | NA          | NA        | 784             | 66.5       | 53.4      |
| 52546                       | CD254                          |                                   | 415     | 34.7      | 74.4     | 46.5      | 68.3         | 131          | 27.1         | 232      | 68.8        | 57.7      | 888             | 160        | 49.2      |
| 52547                       | CD255                          |                                   | 447     | 105       | 101      | 40.6      | 77.4         | 156          | 25           | 222      | 33          | 21.2      | 835             | 101        | 56.3      |
| 52548                       | CD256                          |                                   | 450     | 44.8      | 41.3     | 19        | 42.8         | 72.1         | 15.4         | 221      | 148         | 81.3      | 888             | 187        | NA        |
| 52549                       | CD257                          |                                   | 298     | NA        | 18.2     | 15.3      | 61.6         | 215          | 34.9         | NA       | NA          | NA        | 377             | NA         | NA        |
| 52550                       | CD245                          |                                   | 540     | 45.2      | 44.2     | 1.79      | 201          | 511          | 3.47         | NA       | NA          | NA        | 475             | 26.9       | NA        |
| 52551                       | CD246                          |                                   | 547     | 50.2      | 37       | <LOD      | 204          | 577          | 4.09         | NA       | NA          | NA        | 467             | NA         | 39.2      |
| 52552                       | CD247                          |                                   | 476     | 63.6      | 35.5     | NA        | 217          | 619          | 4.63         | NA       | NA          | NA        | 454             | 33.2       | 59.8      |
| 52553                       | CD253                          |                                   | 479     | 94.3      | 83.5     | NA        | 194          | 523          | 3.98         | 159      | 38.2        | 14.7      | 667             | 83.5       | 64.7      |
| 52554                       | CD258                          |                                   | 495     | NA        | 32.3     | NA        | 37.6         | 412          | 51           | 237      | 42.2        | 10.8      | 819             | 39.5       | 55.5      |
| 52555                       | CD259                          |                                   | 550     | NA        | 35.5     | 19.8      | 110          | 1016         | 126          | 77.6     | NA          | NA        | 493             | NA         | 40        |
| 52556                       | CD260                          |                                   | 587     | NA        | 15.3     | 15.3      | 84.7         | 949          | 131          | 68.4     | NA          | NA        | 337             | NA         | NA        |
| 52557                       | CD306                          |                                   | 475     | NA        | 13.6     | 42.4      | 323          | 665          | 289          | 70.5     | NA          | NA        | 94.8            | NA         | NA        |
| 52558                       | CD305                          |                                   | 444     | 56.9      | 78.6     | 56.3      | 260          | 644          | 105          | 105      | NA          | NA        | 430             | NA         | 117       |
| 52559                       | CD307                          |                                   | 497     | NA        | 37.3     | 10.3      | 49.5         | 121          | 17.6         | 233      | 51.4        | 29.7      | 801             | 67.6       | NA        |
| 52560                       | CD308                          |                                   | 438     | NA        | 17.8     | 24.8      | 159          | 486          | 158          | NA       | NA          | NA        | 42.9            | NA         | NA        |
| 52561                       | CD309                          |                                   | 529     | 62.7      | 85.9     | 27.3      | 112          | 301          | 42.1         | 103      | 22.5        | 12.7      | 448             | 39.4       | 102       |
| 52562                       | CD311                          |                                   | 516     | NA        | 38.1     | 28.6      | 75.7         | 548          | 118          | 119      | NA          | NA        | 213             | NA         | NA        |
| 52563                       | CD313                          |                                   | 458     | NA        | 39.2     | 13.2      | 35.5         | 234          | 36.7         | 224      | 59.4        | 49.3      | 768             | 54.3       | NA        |
| 52564                       | CD314                          |                                   | 362     | NA        | 34.8     | NA        | 18.4         | 107          | 8.12         | 206      | 90.1        | 112       | 732             | 116        | NA        |
| 52565                       | CD315                          |                                   | 454     | 59.5      | 93.1     | 28.1      | 48.4         | 256          | 29.6         | 219      | 73.1        | 71.9      | 734             | 67.2       | 46.6      |

| DPMSR Sample Identification | Customer Sample Identification |  | CA (µM) | CDCA (µM) | DCA (µM) | HDCA (µM) | MCA (a) (µM) | MCA (b) (µM) | MCA (o) (µM) | TCA (µM) | TCD CA (µM) | TDCA (µM) | TMCA (a+b) (µM) | TUDCA (µM) | UDCA (µM) |
|-----------------------------|--------------------------------|--|---------|-----------|----------|-----------|--------------|--------------|--------------|----------|-------------|-----------|-----------------|------------|-----------|
| 52566                       | CD316                          |  | 106     | NA        | NA       | NA        | 6.56         | 53           | 3.92         | 216      | 126         | 53.2      | 739             | 118        | NA        |
| 52567                       | CD317                          |  | 399     | 34.1      | 14.3     | NA        | 29.4         | 228          | 16           | 220      | 122         | 36.2      | 742             | 75.3       | 51.6      |
| 52568                       | CD318                          |  | 257     | NA        | 12.7     | NA        | 12.4         | 87.7         | 16.3         | 179      | 170         | 158       | 774             | 174        | NA        |
| 52569                       | Wt265                          |  | 514     | NA        | 21       | 34.3      | 136          | 472          | 306          | 127      | NA          | NA        | 325             | 11.3       | NA        |
| 52570                       | Wt266                          |  | 504     | NA        | 34.1     | 34        | 114          | 331          | 172          | 109      | NA          | NA        | 780             | 24.6       | 52.1      |
| 52571                       | Wt267                          |  | 170     | NA        | NA       | 5.02      | 45.9         | 234          | 209          | NA       | NA          | NA        | NA              | NA         | NA        |
| 52572                       | Wt274                          |  | 509     | NA        | 82       | 32.9      | 239          | 571          | 181          | 60.6     | NA          | NA        | 332             | NA         | 63        |
| 52573                       | Wt275                          |  | 340     | 35.1      | 24.2     | 58.9      | 127          | 495          | 244          | NA       | NA          | NA        | 49.6            | NA         | NA        |
| 52574                       | Wt276                          |  | 436     | 84.4      | 123      | 20.1      | 284          | 592          | 187          | 138      | NA          | NA        | 337             | NA         | 131       |
| 52575                       | Wi286                          |  | 356     | NA        | 421      | 89.3      | 70.1         | 89.1         | 33.2         | 179      | 184         | 461       | 976             | 224        | 60.9      |
| 52576                       | Wi287                          |  | 454     | NA        | 71.8     | 47.3      | 34.8         | 68.2         | 26.8         | 211      | 72.2        | 178       | 719             | 106        | NA        |
| 52577                       | Wi288                          |  | 455     | NA        | 46.9     | 15        | 56.7         | 179          | 38.7         | 87.4     | 12.4        | NA        | 379             | 23.8       | NA        |
| 52578                       | Wi289                          |  | 410     | NA        | 14.9     | 13.3      | 31.5         | 46.5         | 12.8         | 183      | 209         | 146       | 731             | 151        | NA        |
| 52579                       | Wt292                          |  | NA      | NA        | NA       | NA        | NA           | NA           | NA           | 131      | 184         | 312       | 688             | 169        | NA        |
| 52580                       | Wt297                          |  | 466     | NA        | 57.9     | 50.4      | 188          | 646          | 179          | 73.7     | NA          | NA        | 681             | NA         | 43.1      |

**Table 4. Samples and Analytes above the Highest Calibration Standard**

### 5496 Bile Acids QC Data.xlsx

This worksheet contains the Biocrates plasma QC concentration data for three levels of QCs. The measurements for the QC samples are provided in order to confirm that quantification of the metabolites across a wide dynamic range performed in this analysis is generally accurate and reproducible. The QC values showed excellent reproducibility (Table 3).

**Table 3. Reproducibility of QC Sample Analyses**

| QC Level | Average % CV | Min %CV | Max %CV |
|----------|--------------|---------|---------|
| Low      | 7.6          | 1.0     | 28.9    |
| Medium   | 2.5          | 0.9     | 8.8     |
| High     | 2.5          | 0.4     | 8.4     |

The DPMCF Global Reference QC results are used internally by the Core to assess the reproducibility of the assay within and across projects.

### 5496 Bile Acids Data Dictionary Column Header Definitions

Excel workbook 5496 Data Dictionary contains useful information about the analytes detected using the Biocrates Bile Acids kit.

- 1) FLDNAME
- 2) DESCRIPTION
- 3) MOLECULARWEIGHT
- 4) MOLECULARFORMULA
- 5) KEGG
  - a. Kyoto Encyclopedia of Genes and Genomes
  - b. <http://www.genome.jp/kegg/>
- 6) MOLECULE
  - a. Alternate name
- 7) CAS
  - a. Chemical Abstracts Service Registry Number
  - b. <https://www.cas.org/content/chemical-substances>
- 8) INCHIKEY
  - a. IUPAC International Chemical Identifier Key
  - b. <http://www.iupac.org/home/publications/e-resources/inchi.html>
- 9) HMDB
  - a. Human Metabolome Database
  - b. <http://www.hmdb.ca/>
- 10) CHEBI
  - a. Chemical Entities of Biological Interest
  - b. <https://www.ebi.ac.uk/chebi/>
- 11) IUPAC
  - a. International Union of Pure and Applied Chemistry
  - b. <http://www.iupac.org/>
- 12) ISOMERIC
  - a. SMILES (simplified molecular-input line-entry system)
  - b. [http://en.wikipedia.org/wiki/Simplified\\_molecular-input\\_line-entry\\_system](http://en.wikipedia.org/wiki/Simplified_molecular-input_line-entry_system)
- 13) INCHI
  - a. IUPAC International Chemical Identifier
  - b. <http://www.iupac.org/home/publications/e-resources/inchi.html>
- 14) MESH

- a. NCBI Medical Subject Headings name
  - b. <http://www.ncbi.nlm.nih.gov/mesh>
- 15) LMID
- a. Lipid Maps
  - b. <http://www.lipidmaps.org/>

### Principal Components Analysis (PCA) Plots

In order to assess general variability of the sample data and to look for sample outliers; a Principal Components Analysis (PCA) was performed for bile acids using JMP® Pro v14.0 software (SAS, Cary, NC) from table **5496 Bile Acids Data.xlsx**. Analytes with measurable concentrations for more than half of the samples were included in the PCA analysis. For missing values within the remaining analytes, these missing values were replaced with the Biocrates LOD value for that analyte. The restricted maximum likelihood (REML) method was used for correlation during the PCA analysis in JMP Pro.

**Figure 4** below shows the PCA plot performed in JMP using the values in the “*Status Columns Removed uM*” tab from **5496 Bile Acids Data.xlsx**. Note in this analysis that separate colors were assigned to study samples (red for CD and blue for WT) and SPQC (green) in order to evaluate variability and to check for outliers. The results for the pool (blue dots) are clustered together centrally within the samples from which they were created which implies that very minimal technical variability

### Recommended Steps Before Statistical Analysis

- Remove analytes with >40% missing values (may supplement with test for statistical difference in proportion of missing values between groups, if unblinded)
- Replace missing values (“<LOD”) with either the Biocrates LOD value or (LOD)/2.
- Scale log<sub>2</sub> as necessary for analytes with non-normal distributions. This is likely to be needed for bile acids data.

Figure 4. Principal Components Analysis of Bile Acids  $\mu\text{M}$  concentration Data

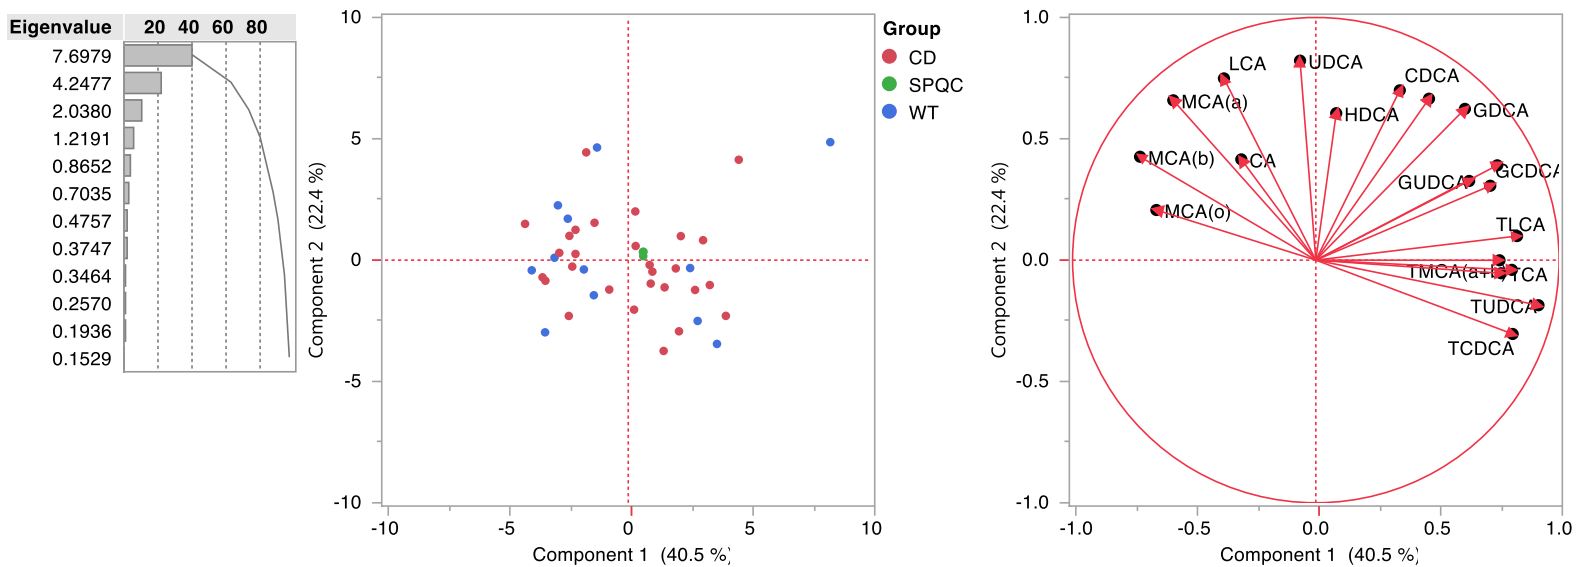

Supplement: 41467_2022_28126_MOESM1_ESM.pdf [file 41467_2022_28126_MOESM1_ESM.pdf]
